# Supplementary material for: Metal bioaccumulation prediction via QSPR-q-RASPR synergy and cross-species risk analysis
Source: Royal Society of Chemistry journal article supplement (doi:10.1039/d5gc00904a), 2025-01-01
Supplement: d5gc00904a1.xlsx [file d5gc00904a1.xlsx]

## Sheet: Title
								SI-1
									Metal Bioaccumulation Prediction via QSPR-q-RASPR Synergy and Cross-Species Risk Analysis
		Ramin Abdullayev1#, Kabiruddin Khan1*#, Gopala Krishna Jillella2, Varun Gopalakrishnan Nair1, Sk. Abdul Amin3, Joyita Roy4, Mahmoud Bousily1, Agnieszka Gajewicz-Skretna1*
	1Laboratory of Environmental Chemoinformatics, Faculty of Chemistry, University of Gdansk, Wita Stwosza 63, 80-308 Gdansk, Poland
	2Department of Pharmaceutical Chemistry, Dr. K. V. Subba Reddy Institute of Pharmacy, Dupadu, Kurnool, Andhra Pradesh, India-518218
	3Department of Pharmacy, University of Salerno, Via Giovanni Paolo II, 132, 84084 Fisciano, SA, Italy
	4Global College of Pharmaceutical Technology, NH34, Palpara, Kolkata, West Bengal 741102, India
	#Equal contribution as first authors
	*Corresponding authors: K Khan, Email: kabiruddin.khan@ug.edu.pl, Phone: +48 691416458
	A Gajewicz-Skretna, Email: agnieszka.gajewicz@ug.edu.pl, Phone: +48 585235246
	URL: https://nanosens.ug.edu.pl/

## Sheet: Sheet 1-Metals_Data
No.	CAS Number	CAS Number	Chemical Name	Smiles	BCF 1 Unit	pBCF(Algae)	pBCF(Amphibians)	pBCF(Crustaceans)	pBCF(Fish)	pBCF(Insects)	pBCF(Invertebrates)	pBCF(Molluscs)	pBCF(Moss)	pBCF(Plants)	pBCF(Worms)	Count	Mean_p(BCF)	SD_p(BCF)
1	7429-90-5	7429905	Aluminum	[Al]	L/kg	NA	NA	NA	1.5563	NA	NA	NA	5.73239	2.34449	NA	3	3.21106	2.21882
2	7439-89-6	7439896	Iron	[Fe]	L/kg	NA	NA	2.30103	0.863323	NA	NA	5.0569	6.43136	3.84491	NA	5	3.69951	2.19809
3	7439-92-1	7439921	Lead	[Pb]	L/kg	NA	NA	1.80618	0.531479	1.61278	2.30103	2.91238	5.53148	4.02119	NA	7	2.67379	1.66562
4	7439-96-5	7439965	Manganese	[Mn]	L/kg	3.92942	NA	3.87506	2.34242	NA	1.43136	NA	5.78533	2.97451	NA	6	3.38968	1.50799
5	7439-97-6	7439976	Mercury	[Hg]	L/kg	5.14613	0.176091	3.09691	4.43136	NA	NA	1.79239	NA	3.19838	NA	6	2.97354	1.79622
6	7440-02-0	7440020	Nickel	[Ni]	L/kg	4.88649	NA	NA	0.5	NA	NA	0.939519	NA	2.0607	NA	4	2.09668	1.97254
7	7440-22-4	7440224	Silver	[Ag]	L/kg	5.36173	NA	4	0.5	NA	4.61278	3	NA	NA	NA	5	3.4949	1.88442
8	7440-31-5	7440315	Tin	[Sn]	L/kg	NA	NA	NA	NA	NA	NA	4.51188	NA	NA	NA	1	NA	NA
9	7440-36-0	7440360	Antimony	[Sb]	L/kg	1.23045	NA	0.643453	-0.39794	NA	0.778151	0.633468	NA	NA	0.633468	6	0.586842	0.534449
10	7440-38-2	7440382	Arsenic	[As]	L/kg	3.90309	NA	NA	0.623249	NA	NA	2.04139	3.78533	2.44091	NA	5	2.55879	1.35457
11	7440-39-3	7440393	Barium	[Ba]	L/kg	NA	NA	2	0.5	NA	NA	1.15836	NA	NA	NA	3	1.21945	0.751864
12	7440-43-9	7440439	Cadmium	[Cd]	L/kg	3.25527	NA	3	1.09691	3.83569	NA	3.36855	4.27875	5.25527	NA	7	3.44149	1.28311
13	7440-47-3	7440473	Chromium	[Cr]	L/kg	4.46675	NA	NA	0.127105	NA	NA	2.47712	NA	NA	NA	3	2.35699	2.17231
14	7440-48-4	7440484	Cobalt	[Co]	L/kg	NA	NA	2.39794	0.334454	NA	1.88649	2.62325	NA	NA	NA	4	1.81053	1.0312
15	7440-50-8	7440508	Copper	[Cu]	L/kg	3.62839	NA	1.44716	6.41313	0.944483	3.57415	4.08636	4.6721	3.63392	NA	8	3.54996	1.73076
16	7440-62-2	7440622	Vanadium	[V]	L/kg	4.23401	NA	NA	0.5	NA	NA	3.74819	NA	NA	NA	3	2.8274	2.03017
17	7440-66-6	7440666	Zinc	[Zn]	L/kg	4.27875	NA	2.30103	-1.52288	0.832509	3.54083	1.15836	4.51851	3.06633	NA	8	2.27168	2.03642
18	7440-70-2	7440702	Calcium	[Ca]	L/kg	NA	NA	NA	0.5	NA	NA	3.11394	NA	NA	NA	2	NA	NA
19	7782-49-2	7782492	Selenium	[Se]	L/kg	0.113943	NA	2.65321	0.886491	3.26221	NA	NA	NA	NA	NA	4	1.72897	1.47458

## Sheet: Sheet 2-MetalsHalide_Data
No.	CAS Number	CAS Number	Chemical Name	Smiles	BCF 1 Unit	pBCF(Algae)	pBCF(Amphibians)	pBCF(Crustaceans)	pBCF(Fish)	pBCF(Insects)	pBCF(Invertebrates)	pBCF(Molluscs)	pBCF(Moss)	pBCF(Plants)	pBCF(Worms)	COUNT	Mean_p(BCF)	SD_p(BCF)
58	7446-70-0	7446700	Aluminum chloride (AlCl3)	[Al](Cl)(Cl)Cl	L/kg	NA	NA	4.51851	Na	NA	NA	2.39794	NA	NA	NA	2	NA	NA
59	7447-39-4	7447394	Copper chloride (CuCl2)	[Cu](Cl)Cl	L/kg	3.73911	NA	2.93551	1.03743	NA	NA	2.70501	NA	2.95472	2.64444	6	2.66937	0.890137
60	7487-94-7	7487947	Mercury chloride (HgCl2)	[Hg](Cl)Cl	L/kg	5.09691	NA	2.39794	2.90526	4.10037	1.07918	0.0791812	NA	2.58583	2.96848	8	2.65164	1.57669
61	7550-35-8	7550358	Lithium bromide (LiBr)	Br[Li]	L/kg	NA	NA	NA	1.49136	NA	NA	NA	NA	NA	NA	1	NA	NA
62	7646-78-8	7646788	Tetrachlorostannane (SnCl4)	[Sn](Cl)(Cl)(Cl)Cl	L/kg	4.94939	NA	NA	NA	NA	NA	NA	NA	NA	NA	1	NA	NA
63	7646-79-9	7646799	Cobalt chloride (CoCl2)	[Co](Cl)Cl	L/kg	3.38739	NA	1.20412	-0.267606	NA	NA	2.87852	3.69897	3.59517	NA	6	2.41609	1.60402
64	7646-85-7	7646857	Zinc chloride (ZnCl2)	[Zn](Cl)Cl	L/kg	4.25563	NA	2.81291	1.65321	3.02119	NA	2.02768	3.65619	2.0086	2.64147	8	2.75961	0.882449
65	7647-17-8	7647178	Cesium chloride (CsCl)	Cl[Cs]	L/kg	NA	NA	NA	0.908485	NA	NA	NA	NA	NA	NA	1	NA	NA
66	7681-49-4	7681494	Sodium fluoride (NaF)	F[Na]	L/kg	NA	NA	NA	0.80618	NA	NA	NA	NA	NA	NA	1	NA	NA
67	7705-08-0	7705080	Iron chloride (FeCl3)	[Fe](Cl)(Cl)Cl	L/kg	NA	NA	4.5682	NA	5.38382	NA	1.72428	NA	2	NA	4	3.41907	1.83183
68	7718-54-9	7718549	Nickel chloride (NiCl2)	[Ni](Cl)Cl	L/kg	3.43136	NA	0.845098	-1.12494	NA	NA	NA	NA	2	1.6721	5	1.36472	1.67612
69	7758-89-6	7758896	Copper chloride (CuCl)	Cl[Cu]	L/kg	NA	NA	2.93551	NA	NA	NA	NA	NA	2.71684	NA	2	NA	NA
70	7758-94-3	7758943	Iron chloride (FeCl2)	[Fe](Cl)Cl	L/kg	NA	NA	NA	1.15229	NA	NA	NA	NA	NA	NA	1	NA	NA
71	7758-95-4	7758954	Lead chloride (PbCl2)	[Pb](Cl)Cl	L/kg	NA	NA	3.28556	NA	NA	NA	1.38021	NA	2.75282	2.58659	4	2.50129	0.80466
72	777301-5	7773015	Manganese chloride (MnCl2)	[Mn](Cl)Cl	L/kg	3.98811	NA	2.50515	1.35411	NA	NA	3.30557	NA	NA	NA	4	2.78823	1.13199
73	7783-90-6	7783906	Silver chloride	[Ag]Cl	L/kg	3.11394	NA	1.91381	1.80618	NA	NA	1.43136	NA	NA	NA	4	2.06633	0.728381
74	7787-47-5	7787475	Beryllium chloride	[Be](Cl)Cl	L/kg	NA	NA	NA	-0.0705811	NA	NA	NA	NA	NA	NA	1	NA	NA
75	10025-82-8	10025828	Indium chloride (InCl3)	[In](Cl)(Cl)Cl	L/kg	NA	NA	NA	1.95904	NA	NA	NA	NA	NA	NA	1	NA	NA
76	10025-91-9	10025919	Antimony trichloride	[Sb](Cl)(Cl)Cl	L/kg	NA	NA	NA	NA	NA	NA	-0.823909	3.74036	NA	NA	2	NA	NA
77	10026-03-6	10026036	(T-4)-Selenium chloride (SeCl4)	[Se](Cl)(Cl)(Cl)Cl	L/kg	NA	NA	NA	NA	NA	NA	NA	NA	-0.342944	NA	1	NA	NA
78	10043-52-4	10043524	Calcium chloride (CaCl2)	[Ca](Cl)Cl	L/kg	NA	NA	0.369216	NA	NA	NA	NA	NA	NA	NA	1	NA	NA
79	10108-64-2	10108642	Cadmium chloride (CdCl2)	[Cd](Cl)Cl	L/kg	2.96567	2	5.11727	0.30103	5.48572	1.95424	1.77815	3.88224	4.08418	4.26553	10	3.1834	1.65841
80	10112-91-1	10112911	Mercury chloride (Hg2Cl2)	[Hg]([Hg]Cl)Cl	L/kg	NA	NA	NA	3.11394	NA	NA	NA	NA	NA	NA	1	NA	NA
81	10361-37-2	10361372	Barium chloride	[Ba](Cl)Cl	L/kg	3.78462	NA	NA	1.77815	NA	NA	NA	NA	NA	NA	2	NA	NA
82	10476-85-4	10476854	Strontium chloride (SrCl2)	[Sr](Cl)Cl	L/kg	NA	NA	NA	1.77085	NA	NA	NA	NA	NA	NA	1	NA	NA
83	11132-78-8	11132788	Manganese chloride	[Mn](Cl)Cl	L/kg	NA	NA	0.681241	-0.69897	NA	NA	3.42862	NA	NA	NA	3	1.13696	2.10119
84	12040-57-2	12040572	Iron chloride	[Fe](Cl)(Cl)Cl	L/kg	3.91645	NA	NA	2.30103	NA	NA	3.17435	NA	NA	NA	3	3.13061	0.8086
85	51312-24-4	51312244	Mercury chloride	[Cl].[Hg]	L/kg	NA	NA	NA	NA	NA	NA	NA	NA	3.26717	NA	1	NA	NA

## Sheet: Sheet 3-MetalsOxide_Data
No.	CAS Number	CAS Number	Chemical Name	Smiles	BCF 1 Unit	pBCF(Fish)	pBCF(Algae)	pBCF(Amphibians)	pBCF(Crustaceans)	pBCF(Insects)	pBCF(Invertebrates)	pBCF(Molluscs)	pBCF(Moss)	pBCF(Plants)	pBCF(Worms)	count	Mean_p(BCF)	SD_p(BCF)
123	1303-28-2	1303282	Arsenic pentoxide	[O].[As]	L/kg	0.491362	NA	NA	NA	2.11727	NA	1.99564	3.74036	NA	NA	4	2.08616	1.32777
124	1306-19-0	1306190	Cadmium oxide (CdO)	[Cd]=O	L/kg	1.75587	NA	NA	NA	NA	NA	NA	NA	NA	NA	1	NA	NA
125	1314-13-2	1314132	Zinc oxide (ZnO)	O=[Zn]	L/kg	0.357935	NA	NA	NA	NA	NA	NA	NA	NA	NA	1	NA	NA
126	1314-41-6	1314416	Lead oxide (Pb3O4)	O1[Pb]O[Pb]12O[Pb]O2	L/kg	2.37475	NA	NA	NA	NA	NA	NA	NA	NA	NA	1	NA	NA
127	1314-62-1	1314621	Vanadium oxide (V2O5)	[O-2].[O-2].[O-2].[O-2].[O-2].[V].[V]	L/kg	1.40654	NA	NA	NA	NA	NA	NA	NA	NA	NA	1	NA	NA
128	1317-36-8	1317368	Lead oxide (PbO)	O=[Pb]	L/kg	1.63347	NA	NA	NA	NA	NA	NA	NA	NA	NA	1	NA	NA
129	1317-38-0	1317380	Copper oxide (CuO)	[Cu]=O	L/kg	1.8451	NA	NA	NA	NA	NA	NA	NA	NA	NA	1	NA	NA
130	1327-53-3	1327533	Arsenic oxide (As2O3)	[O-2].[O-2].[O-2].[As+3].[As+3]	L/kg	0.60206	NA	NA	2.34044	1.59106	NA	1.91908	NA	NA	1.1038	5	1.51129	0.680606
131	1333-82-0	1333820	Chromium oxide (CrO3)	[Cr](=O)(=O)=O	L/kg	1.85733	NA	NA	NA	NA	NA	NA	NA	2.55509	NA	2	NA	NA
132	744608-4	7446084	Selenium oxide (SeO2)	[Se](=O)=O	L/kg	NA	NA	NA	NA	NA	NA	NA	2.74036	1.11394	NA	2	NA	NA
133	13463-67-7	13463677	Titanium oxide (TiO2)	[Ti](=O)=O	L/kg	1	NA	NA	NA	NA	NA	NA	NA	NA	NA	1	NA	NA
134	14124-67-5	14124675	Selenite	[Se](=O)([O-])[O-]	L/kg	-0.221849	2.20412	NA	1.17609	NA	NA	2.39794	NA	1.70757	NA	5	1.45277	1.04925
135	14124-68-6	14124686	Selenate	[Se](=O)(=O)([O-])[O-]	L/kg	6.80618	NA	NA	NA	NA	NA	1.17609	NA	NA	NA	2	NA	NA
136	14333-18-7	14333187	(T-4)-Vanadate (VO43-)	[V-3](=O)(=O)(=O)=O	L/kg	1.50515	NA	NA	NA	NA	NA	NA	NA	NA	NA	1	NA	NA
137	21908-53-2	21908532	Mercury oxide (HgO)	[Hg]=O	L/kg	3.86153	NA	NA	NA	NA	NA	NA	NA	NA	NA	1	NA	NA

## Sheet: Sheet 4-QSPR_Descriptors_Metals
No.	CAS Number	Chemical Name	Smiles	MW	logKow	First-generation elemental descriptors																																		Second-generation descriptors
						D1_Metals	D2_SemiMetals	D3_HeteroNonMetals	Metals_SumIP	SemiMetals_SumIP	Electrons_ActiveM	AtWt_ActiveM	MassNo_ActiveM	Neutons_ActiveM	IP_ActivM	X_ActivM	VWR_ActivM	Electrons_Activ_SM	AtWt_Activ_SM	MassNo_Activ_SM	Neutons_Activ_SM	IP_Activ_SM	X_Activ_SM	VWR_Activ_SM	Electrons_Activ_NM	AtWt_Activ_NM	MassNo_Activ_NM	Neutons_Activ_NM	IP_Activ_NM	X_Activ_NM	VWR_Activ_NM	SuM_Active_M_SM	SuMElectrons_Active_M_SM	SuMAtWt_Active_M_SM	SuMMassNo_Active_M_SM	SuMNeutons_Active_M_SM	MW	χ (electronegativity) Pauling scale	∑χ	Z_metal (atomic no)	Zv_metal	PN_metal	λ = (Zmetal − Zvmetal)/Zvmetal	μ=1/(PN-1)_metal	Vmetal	αmetal = λ·μ	∑αmetal = αmetal·Nmetal	εmetal = −αmetal + (0.3·Zvmetal)	(∑α)2
1	7429-90-5	Aluminum	[Al]	26.982	0.33	1	0	0	577.4	0	13	26.982	27	14	577.4	1.5	0.143	0	0	0	0	0	0	0	0	0	0	0	0	0	0	1	13	26.982	27	14	26.982	1.61	1.61	13	3	3	3.33333	0.5	3	1.66667	1.66667	-0.766667	2.77778
2	7439-89-6	Iron	[Fe]	55.845	-0.77	1	0	0	761	0	26	55.845	56	30	761	1.8	0.126	0	0	0	0	0	0	0	0	0	0	0	0	0	0	1	26	55.845	56	30	55.845	1.83	1.83	26	8	4	2.25	0.333333	3	0.75	0.75	1.65	0.5625
3	7439-92-1	Lead	[Pb]	207.2	0.73	1	0	0	715.4	0	82	207.2	207	125	715.4	1.8	0.154	0	0	0	0	0	0	0	0	0	0	0	0	0	0	1	82	207.2	207	125	207.2	2.33	2.33	82	4	6	19.5	0.2	4	3.9	3.9	-2.7	15.21
4	7439-96-5	Manganese	[Mn]	54.938	0.23	1	0	0	716	0	25	54.938	55	30	716	1.5	0.126	0	0	0	0	0	0	0	0	0	0	0	0	0	0	1	25	54.938	55	30	54.938	1.55	1.55	25	7	4	2.57143	0.333333	4	0.857143	0.857143	1.24286	0.734694
5	7439-97-6	Mercury	[Hg]	200.59	0.62	1	0	0	1004.6	0	80	200.59	201	121	1004.6	1.9	0.157	0	0	0	0	0	0	0	0	0	0	0	0	0	0	1	80	200.59	201	121	200.59	2	2	80	2	6	39	0.2	2	7.8	7.8	-7.2	60.84
6	7440-02-0	Nickel	[Ni]	58.6934	-0.57	1	0	0	735	0	28	58.6934	59	31	735	1.8	0.124	0	0	0	0	0	0	0	0	0	0	0	0	0	0	1	28	58.6934	59	31	58.6934	1.91	1.91	28	2	4	13	0.333333	2	4.33333	4.33333	-3.73333	18.7778
7	7440-22-4	Silver	[Ag]	107.868	0.23	1	0	0	758	0	47	107.868	108	61	758	1.9	0.144	0	0	0	0	0	0	0	0	0	0	0	0	0	0	1	47	107.868	108	61	107.868	1.93	1.93	47	1	5	46	0.25	1	11.5	11.5	-11.2	132.25
8	7440-31-5	Tin	[Sn]	118.71	1.29	1	0	0	708.4	0	50	118.71	119	69	708.4	1.8	0.162	0	0	0	0	0	0	0	0	0	0	0	0	0	0	1	50	118.71	119	69	118.71	1.96	1.96	50	6	5	7.33333	0.25	4	1.83333	1.83333	-0.0333333	3.36111
9	7440-36-0	Antimony	[Sb]	121.76	0.73	0	1	0	0	834	0	0	0	0	0	0	0	51	121.76	122	71	834	1.9	0.159	0	0	0	0	0	0	0	1	51	121.76	122	71	121.76	2.05	2.05	51	5	5	9.2	0.25	5	2.3	2.3	-0.8	5.29
10	7440-38-2	Arsenic	[As]	74.922	0.68	0	1	0	0	947	0	0	0	0	0	0	0	33	74.922	75	42	947	2	0.139	0	0	0	0	0	0	0	1	33	74.922	75	42	74.922	2.18	2.18	33	5	4	5.6	0.333333	5	1.86667	1.86667	-0.366667	3.48444
11	7440-39-3	Barium	[Ba]	137.33	0.23	1	0	0	502.7	0	56	137.33	137	81	502.7	0.9	0.222	0	0	0	0	0	0	0	0	0	0	0	0	0	0	1	56	137.33	137	81	137.33	0.89	0.89	56	2	6	27	0.2	2	5.4	5.4	-4.8	29.16
12	7440-43-9	Cadmium	[Cd]	112.414	-0.07	1	0	0	866	0	48	112.414	112	64	866	1.7	0.154	0	0	0	0	0	0	0	0	0	0	0	0	0	0	1	48	112.414	112	64	112.414	1.69	1.69	48	2	5	23	0.25	2	5.75	5.75	-5.15	33.0625
13	7440-47-3	Chromium	[Cr]	51.996	0.23	1	0	0	651.1	0	24	51.996	52	28	651.1	1.6	0.127	0	0	0	0	0	0	0	0	0	0	0	0	0	0	1	24	51.996	52	28	51.996	1.66	1.66	24	6	4	3	0.333333	2	1	1	0.8	1
14	7440-48-4	Cobalt	[Co]	58.933	0.23	1	0	0	757	0	27	58.933	59	32	757	1.8	0.125	0	0	0	0	0	0	0	0	0	0	0	0	0	0	1	27	58.933	59	32	58.933	1.88	1.88	27	2	4	12.5	0.333333	3	4.16667	4.16667	-3.56667	17.3611
15	7440-50-8	Copper	[Cu]	63.546	-0.57	1	0	0	743.5	0	29	63.546	64	35	743.5	1.9	0.128	0	0	0	0	0	0	0	0	0	0	0	0	0	0	1	29	63.546	64	35	63.546	1.9	1.9	29	2	4	13.5	0.333333	2	4.5	4.5	-3.9	20.25
16	7440-62-2	Vanadium	[V]	50.942	0.23	1	0	0	649.1	0	23	50.942	51	28	649.1	1.6	0.134	0	0	0	0	0	0	0	0	0	0	0	0	0	0	1	23	50.942	51	28	50.942	1.63	1.63	23	5	4	3.6	0.333333	3	1.2	1.2	0.3	1.44
17	7440-66-6	Zinc	[Zn]	65.38	-0.47	1	0	0	904.5	0	30	65.38	65	35	904.5	1.6	0.138	0	0	0	0	0	0	0	0	0	0	0	0	0	0	1	30	65.38	65	35	65.38	1.65	1.65	30	2	4	14	0.333333	2	4.66667	4.66667	-4.06667	21.7778
18	7440-70-2	Calcium	[Ca]	40.078	-0.57	1	0	0	589.6	0	20	40.078	40	20	589.6	1	0.197	0	0	0	0	0	0	0	0	0	0	0	0	0	0	1	20	40.078	40	20	40.078	1	1	20	2	4	9	0.333333	2	3	3	-2.4	9
19	7782-49-2	Selenium	[Se]	78.96	0.24	0	0	1	0	0	0	0	0	0	0	0	0	0	0	0	0	0	0	0	34	78.96	79	45	941	2.4	0.14	0	0	0	0	0	78.96	2.55	2.55	34	6	4	4.66667	0.333333	6	1.55556	1.55556	0.244444	2.41975
[truncated: 8 more columns]

## Sheet: Sheet 5-QSPR_Descriptors_MX
No.	CAS Number	Chemical Name	Smiles	MW	logKow	First-generation elemental descriptors																																					Second-generation descriptors
						D1_Metals	D2_SemiMetals	D3_HeteroNonMetals	Metals_SumIP	SemiMetals_SumIP	Electrons_ActiveM	AtWt_ActiveM	MassNo_ActiveM	Neutons_ActiveM	IP_ActivM	X_ActivM	VWR_ActivM	Electrons_Activ_SM	AtWt_Activ_SM	MassNo_Activ_SM	Neutons_Activ_SM	IP_Activ_SM	X_Activ_SM	VWR_Activ_SM	Electrons_Activ_NM	AtWt_Activ_NM	MassNo_Activ_NM	Neutons_Activ_NM	IP_Activ_NM	X_Activ_NM	VWR_Activ_NM	SuM_Active_M_SM	SuMElectrons_Active_M_SM	SuMAtWt_Active_M_SM	SuMMassNo_Active_M_SM	SuMNeutons_Active_M_SM	MW	Nhalogen	χ (electronegativity) Pauling scale	∑χ	∑χ/nHalogen	χox(oxidation number of the metal)	Z_metal	Zv_metal	PN_metal	λ = (Zmetal − Zvmetal)/Zvmetal	μ = 1/(PNmetal − 1)	Valence	αmetal = λ·μ
58	7446-70-0	Aluminum chloride (AlCl3)	[Al](Cl)(Cl)Cl	133.34	1.26	1	0	3	577.4	0	13	26.982	27	14	577.4	1.5	0.143	0	0	0	0	0	0	0	17	35.45	35	18	1255.7	3	0.127	1	13	26.982	27	14	133.34	3	1.61	1.61	0.536667	3	13	3	3	3.33333	0.5	3	1.66667
59	7447-39-4	Copper chloride (CuCl2)	[Cu](Cl)Cl	134.452	0.05	1	0	2	743.5	0	29	63.546	64	35	743.5	1.9	0.128	0	0	0	0	0	0	0	17	35.45	35	18	1255.7	3	0.127	1	29	63.546	64	35	134.452	2	1.9	1.9	0.95	2	29	2	4	13.5	0.333333	2	4.5
60	7487-94-7	Mercury chloride (HgCl2)	[Hg](Cl)Cl	271.496	-0.22	1	0	2	1004.6	0	80	200.59	201	121	1004.6	1.9	0.157	0	0	0	0	0	0	0	17	35.45	35	18	1255.7	3	0.127	1	80	200.59	201	121	271.496	2	2	2	1	2	80	2	6	39	0.2	2	7.8
61	7550-35-8	Lithium bromide (LiBr)	Br[Li]	86.845	0.63	1	0	1	520.1	0	3	6.94	7	4	520.1	1	0.145	0	0	0	0	0	0	0	35	79.904	80	45	1142.7	2.8	0.165	1	3	6.94	7	4	86.845	1	0.98	0.98	0.98	1	3	1	2	2	1	1	2
62	7646-78-8	Tetrachlorostannane (SnCl4)	[Sn](Cl)(Cl)(Cl)Cl	260.51	-1.53	1	0	4	708.4	0	50	118.71	119	69	708.4	1.8	0.162	0	0	0	0	0	0	0	17	35.45	35	18	1255.7	3	0.127	1	50	118.71	119	69	260.51	4	1.96	1.96	0.49	4	50	4	5	11.5	0.25	4	2.875
63	7646-79-9	Cobalt chloride (CoCl2)	[Co](Cl)Cl	129.839	0.85	1	0	2	757	0	27	58.933	59	32	757	1.8	0.125	0	0	0	0	0	0	0	17	35.45	35	18	1255.7	3	0.127	1	27	58.933	59	32	129.839	2	1.88	1.88	0.94	2	27	2	4	12.5	0.333333	4	4.16667
64	7646-85-7	Zinc chloride (ZnCl2)	[Zn](Cl)Cl	136.286	0.15	1	0	2	904.5	0	30	65.38	65	35	904.5	1.6	0.138	0	0	0	0	0	0	0	17	35.45	35	18	1255.7	3	0.127	1	30	65.38	65	35	136.286	2	1.65	1.65	0.825	2	30	2	4	14	0.333333	2	4.66667
65	7647-17-8	Cesium chloride (CsCl)	Cl[Cs]	168.36	0.54	1	0	1	375.6	0	55	132.91	133	78	375.6	0.7	0.267	0	0	0	0	0	0	0	17	35.45	35	18	1255.7	3	0.127	1	55	132.91	133	78	168.36	1	0.79	0.79	0.79	1	55	1	6	54	0.2	1	10.8
66	7681-49-4	Sodium fluoride (NaF)	F[Na]	41.9882	0.23	1	0	1	495.7	0	11	22.99	23	12	495.7	0.9	0.196	0	0	0	0	0	0	0	9	18.998	19	10	1680.6	4	0.135	1	11	22.99	23	12	41.9882	1	0.93	0.93	0.93	1	11	1	3	10	0.5	1	5
67	7705-08-0	Iron chloride (FeCl3)	[Fe](Cl)(Cl)Cl	162.204	0.16	1	0	3	761	0	26	55.845	56	30	761	1.8	0.126	0	0	0	0	0	0	0	17	35.45	35	18	1255.7	3	0.127	1	26	55.845	56	30	162.204	3	1.83	1.83	0.61	3	26	3	4	7.66667	0.333333	3	2.55556
68	7718-54-9	Nickel chloride (NiCl2)	[Ni](Cl)Cl	129.599	0.05	1	0	2	735	0	28	58.6934	59	31	735	1.8	0.124	0	0	0	0	0	0	0	17	35.45	35	18	1255.7	3	0.127	1	28	58.6934	59	31	129.599	2	1.91	1.91	0.955	2	28	2	4	13	0.333333	2	4.33333
69	7758-89-6	Copper chloride (CuCl)	Cl[Cu]	98.999	-0.26	1	0	1	743.5	0	29	63.546	64	35	743.5	1.9	0.128	0	0	0	0	0	0	0	17	35.45	35	18	1255.7	3	0.127	1	29	63.546	64	35	98.999	1	1.9	1.9	1.9	1	29	1	4	28	0.333333	2	9.33333
70	7758-94-3	Iron chloride (FeCl2)	[Fe](Cl)Cl	126.751	-0.15	1	0	2	761	0	26	55.845	56	30	761	1.8	0.126	0	0	0	0	0	0	0	17	35.45	35	18	1255.7	3	0.127	1	26	55.845	56	30	126.751	2	1.83	1.83	0.915	2	26	2	4	12	0.333333	2	4
71	7758-95-4	Lead chloride (PbCl2)	[Pb](Cl)Cl	278.106	1.35	1	0	2	715.4	0	82	207.2	207	125	715.4	1.8	0.154	0	0	0	0	0	0	0	17	35.45	35	18	1255.7	3	0.127	1	82	207.2	207	125	278.106	2	2.33	2.33	1.165	2	82	4	6	19.5	0.2	4	3.9
72	777301-5	Manganese chloride (MnCl2)	[Mn](Cl)Cl	125.844	0.85	1	0	2	716	0	25	54.938	55	30	716	1.5	0.126	0	0	0	0	0	0	0	17	35.45	35	18	1255.7	3	0.127	1	25	54.938	55	30	125.844	2	1.55	1.55	0.775	2	25	4	4	5.25	0.333333	4	1.75
73	7783-90-6	Silver chloride	[Ag]Cl	143.321	0.54	1	0	1	758	0	47	107.868	108	61	758	1.9	0.144	0	0	0	0	0	0	0	17	35.45	35	18	1255.7	3	0.127	1	47	107.868	108	61	143.321	1	1.93	1.93	1.93	1	47	1	5	46	0.25	1	11.5
74	7787-47-5	Beryllium chloride	[Be](Cl)Cl	79.9182	0.05	1	0	2	899.2	0	4	9.0122	9	5	899.2	1.5	0	0	0	0	0	0	0	0	17	35.45	35	18	1255.7	3	0.127	1	4	9.0122	9	5	79.9182	2	1.57	1.57	0.785	2	4	2	2	1	1	2	1
75	10025-82-8	Indium chloride (InCl3)	[In](Cl)(Cl)Cl	221.18	1.16	1	0	3	558.2	0	49	114.818	115	66	558.2	2	0.162	0	0	0	0	0	0	0	17	35.45	35	18	1255.7	3	0.127	1	49	114.818	115	66	221.18	3	1.78	1.78	0.593333	3	49	3	5	15.3333	0.25	3	3.83333
76	10025-91-9	Antimony trichloride	[Sb](Cl)(Cl)Cl	228.119	1.66	0	1	3	0	834	0	0	0	0	0	0	0	51	121.76	122	71	834	1.9	0.159	17	35.45	35	18	1255.7	3	0.127	1	51	121.76	122	71	228.119	3	2.05	2.05	0.683333	3	51	3	5	16	0.25	5	4
77	10026-03-6	(T-4)-Selenium chloride (SeCl4)	[Se](Cl)(Cl)(Cl)Cl	220.771	0.47	0	0	5	0	0	0	0	0	0	0	0	0	0	0	0	0	0	0	0	34	78.96	79	45	941	2.4	0.14	0	0	0	0	0	220.771	4	2.55	2.55	0.6375	4	34	6	4	4.66667	0.333333	6	1.55556
78	10043-52-4	Calcium chloride (CaCl2)	[Ca](Cl)Cl	110.98	0.05	1	0	2	589.6	0	20	40.078	40	20	589.6	1	0.197	0	0	0	0	0	0	0	17	35.45	35	18	1255.7	3	0.127	1	20	40.078	40	20	110.98	2	1	1	0.5	2	20	2	4	9	0.333333	2	3
79	10108-64-2	Cadmium chloride (CdCl2)	[Cd](Cl)Cl	183.317	-1.65	1	0	2	866	0	48	112.414	112	64	866	1.7	0.154	0	0	0	0	0	0	0	17	35.45	35	18	1255.7	3	0.127	1	48	112.414	112	64	183.317	2	1.69	1.69	0.845	2	48	2	5	23	0.25	2	5.75
80	10112-91-1	Mercury chloride (Hg2Cl2)	[Hg]([Hg]Cl)Cl	472.09	-0.55	2	0	2	2009.2	0	80	200.59	201	121	1004.6	1.9	0.157	0	0	0	0	0	0	0	17	35.45	35	18	1255.7	3	0.127	2	80	200.59	201	121	472.09	2	2	4	2	1	80	2	6	39	0.2	2	7.8
81	10361-37-2	Barium chloride	[Ba](Cl)Cl	208.233	0.85	1	0	2	502.7	0	56	137.33	137	81	502.7	0.9	0.222	0	0	0	0	0	0	0	17	35.45	35	18	1255.7	3	0.127	1	56	137.33	137	81	208.233	2	0.89	0.89	0.445	2	56	2	6	27	0.2	2	5.4
82	10476-85-4	Strontium chloride (SrCl2)	[Sr](Cl)Cl	158.53	0.85	1	0	2	549.2	0	38	87.62	88	50	549.2	1	0.215	0	0	0	0	0	0	0	17	35.45	35	18	1255.7	3	0.127	1	38	87.62	88	50	158.53	2	0.95	0.95	0.475	2	38	2	5	18	0.25	2	4.5
83	11132-78-8	Manganese chloride	[Mn](Cl)Cl	125.844	0.85	1	0	2	716	0	25	54.938	55	30	716	1.5	0.126	0	0	0	0	0	0	0	17	35.45	35	18	1255.7	3	0.127	1	25	54.938	55	30	125.844	2	1.55	1.55	0.775	2	25	4	4	5.25	0.333333	4	1.75
84	12040-57-2	Iron chloride	[Fe](Cl)(Cl)Cl	162.2	0.16	1	0	3	761	0	26	55.845	56	30	761	1.8	0.126	0	0	0	0	0	0	0	17	35.45	35	18	1255.7	3	0.127	1	26	55.845	56	30	162.2	3	1.83	1.83	0.61	3	26	3	4	7.66667	0.333333	3	2.55556
85	51312-24-4	Mercury chloride	[Cl].[Hg]	271.52	-0.16	1	0	1	1004.6	0	80	200.59	201	121	1004.6	1.9	0.157	0	0	0	0	0	0	0	17	35.45	35	18	1255.7	3	0.127	1	80	200.59	201	121	271.52	1	2	2	2	1	80	2	6	39	0.2	1	7.8
[truncated: 15 more columns]

## Sheet: Sheet 6-QSPR_Descriptors_MO
No.	CAS Number	Chemical Name	Smiles	MW	logKow	First-generation elemental descriptors																																				Second-generation descriptors
						D1_Metals	D2_SemiMetals	D3_HeteroNonMetals	Metals_SumIP	SemiMetals_SumIP	Electrons_ActiveM	AtWt_ActiveM	MassNo_ActiveM	Neutons_ActiveM	IP_ActivM	X_ActivM	VWR_ActivM	Electrons_Activ_SM	AtWt_Activ_SM	MassNo_Activ_SM	Neutons_Activ_SM	IP_Activ_SM	X_Activ_SM	VWR_Activ_SM	Electrons_Activ_NM	AtWt_Activ_NM	MassNo_Activ_NM	Neutons_Activ_NM	IP_Activ_NM	X_Activ_NM	VWR_Activ_NM	SuM_Active_M_SM	SuMElectrons_Active_M_SM	SuMAtWt_Active_M_SM	SuMMassNo_Active_M_SM	SuMNeutons_Active_M_SM	Noxygen	χ(Metal electronegativity)	∑χ	∑χ/nO	χox	Z_metal	Zv_metal	PN_metal	λ = (Zmetal − Zvmetal)/Zvmetal	μ = 1/(PNmetal − 1)	Valence	αmetal = λ·μ	∑αmetal = αmetal·Nmetal
123	1303-28-2	Arsenic pentoxide	[O].[As]	229.84	-0.13	0	1	1	0	947	0	0	0	0	0	0	0	33	74.922	75	42	947	2	0.139	8	15.999	16	8	1314	3.5	0.074	1	33	74.922	75	42	5	2.18	2.18	0.872	5	33	5	4	5.6	0.333333	5	1.86667	3.73333
124	1306-19-0	Cadmium oxide (CdO)	[Cd]=O	128.41	-0.07	1	0	1	866	0	48	112.414	112	64	866	1.7	0.154	0	0	0	0	0	0	0	8	15.999	16	8	1314	3.5	0.074	1	48	112.414	112	64	1	1.69	1.69	1.69	2	48	2	5	23	0.25	2	5.75	5.75
125	1314-13-2	Zinc oxide (ZnO)	O=[Zn]	81.38	1.53	1	0	1	904.5	0	30	65.38	65	35	904.5	1.6	0.138	0	0	0	0	0	0	0	8	15.999	16	8	1314	3.5	0.074	1	30	65.38	65	35	1	1.65	1.65	1.65	2	30	2	4	14	0.333333	2	4.66667	4.66667
126	1314-41-6	Lead oxide (Pb3O4)	O1[Pb]O[Pb]12O[Pb]O2	685.6	-3.3	3	0	4	2146.2	0	82	207.2	207	125	715.4	1.8	0.154	0	0	0	0	0	0	0	8	15.999	16	8	1314	3.5	0.074	3	82	207.2	207	125	4	2.33	6.99	1.7475	4	82	4	6	19.5	0.2	4	3.9	11.7
127	1314-62-1	Vanadium oxide (V2O5)	[O-2].[O-2].[O-2].[O-2].[O-2].[V].[V]	181.88	2.97	2	0	5	1298.2	0	23	50.942	51	28	649.1	1.6	0.134	0	0	0	0	0	0	0	8	15.999	16	8	1314	3.5	0.074	2	23	50.942	51	28	5	1.63	3.26	0.652	5	23	5	4	3.6	0.333333	5	1.2	2.4
128	1317-36-8	Lead oxide (PbO)	O=[Pb]	223.2	0.73	1	0	1	715.4	0	82	207.2	207	125	715.4	1.8	0.154	0	0	0	0	0	0	0	8	15.999	16	8	1314	3.5	0.074	1	82	207.2	207	125	1	2.33	2.33	2.33	2	82	4	6	19.5	0.2	4	3.9	3.9
129	1317-38-0	Copper oxide (CuO)	[Cu]=O	79.545	1.43	1	0	1	743.5	0	29	63.546	64	35	743.5	1.9	0.128	0	0	0	0	0	0	0	8	15.999	16	8	1314	3.5	0.074	1	29	63.546	64	35	1	1.9	1.9	1.9	2	29	1	4	28	0.333333	2	9.33333	9.33333
130	1327-53-3	Arsenic oxide (As2O3)	[O-2].[O-2].[O-2].[As+3].[As+3]	197.841	-0.13	0	2	3	0	1894	0	0	0	0	0	0	0	33	74.922	75	42	947	2	0.139	8	15.999	16	8	1314	3.5	0.074	2	33	74.922	75	42	3	2.18	4.36	1.45333	3	33	5	4	5.6	0.333333	5	1.86667	3.73333
131	1333-82-0	Chromium oxide (CrO3)	[Cr](=O)(=O)=O	99.99	2.23	1	0	3	651.1	0	24	51.996	52	28	651.1	1.6	0.127	0	0	0	0	0	0	0	8	15.999	16	8	1314	3.5	0.074	1	24	51.996	52	28	3	1.66	1.66	0.553333	6	24	1	4	23	0.333333	6	7.66667	7.66667
132	744608-4	Selenium oxide (SeO2)	[Se](=O)=O	110.96	-0.77	0	0	3	0	0	0	0	0	0	0	0	0	0	0	0	0	0	0	0	34	78.96	79	45	941	2.4	0.14	0	0	0	0	0	2	2.55	5.1	1.275	4	34	6	4	4.66667	0.333333	6	1.55556	1.55556
133	13463-67-7	Titanium oxide (TiO2)	[Ti](=O)=O	79.866	2.23	1	0	2	658	0	22	47.867	48	26	658	1.5	0.147	0	0	0	0	0	0	0	8	15.999	16	8	1314	3.5	0.074	1	22	47.867	48	26	2	1.54	1.54	0.77	4	81	2	4	39.5	0.333333	4	13.1667	13.1667
134	14124-67-5	Selenite	[Se](=O)([O-])[O-]	172.94	-3.18	0	0	4	0	0	0	0	0	0	0	0	0	0	0	0	0	0	0	0	34	78.96	79	45	941	2.4	0.14	0	0	0	0	0	3	2.55	2.55	0.85	4	34	6	4	4.66667	0.333333	6	1.55556	1.55556
135	14124-68-6	Selenate	[Se](=O)(=O)([O-])[O-]	188.94	-3.18	0	0	5	0	0	0	0	0	0	0	0	0	0	0	0	0	0	0	0	34	78.96	79	45	941	2.4	0.14	0	0	0	0	0	4	2.55	2.55	0.6375	6	34	6	4	4.66667	0.333333	6	1.55556	1.55556
136	14333-18-7	(T-4)-Vanadate (VO43-)	[V-3](=O)(=O)(=O)=O	114.939	2.23	1	0	4	649.1	0	23	50.942	51	28	649.1	1.6	0.134	0	0	0	0	0	0	0	8	15.999	16	8	1314	3.5	0.074	1	23	50.942	51	28	4	1.63	1.63	0.4075	5	23	2	4	10.5	0.333333	5	3.5	3.5
137	21908-53-2	Mercury oxide (HgO)	[Hg]=O	216.589	1.53	1	0	1	1004.6	0	80	200.59	201	121	1004.6	1.9	0.157	0	0	0	0	0	0	0	8	15.999	16	8	1314	3.5	0.074	1	80	200.59	201	121	1	2	2	2	2	80	2	6	39	0.2	2	7.8	7.8
[truncated: 12 more columns]

## Sheet: Sheet 7_QSPR Models
Metals																																									Metal halides
pBCF(Algae)								pBCF(Crustaceans)								pBCF(Fish)								pBCF(Molluscs)								pBCF(Plants)									pBCF(Algae)								pBCF(Crustaceans)
Chemical Name	∑ε = εmetal·Nmeta	crystal ionic radius of the metal (pm)	Observed pBCF(Algae)	Set*	Predicted pBCF(Algae)	Residuals		Chemical Name	(∑α)2	Crystal ionic radius of the metal (pm)	Observed pBCF(Crustaceans)	Set*	Predicted pBCF(Crustaceans)	Residuals		Chemical Name	Electrons_ActiveM	Crystal ionic radius of the metal (pm)	Observed pBCF(Fish)	Set	Predicted pBCF(Fish)	Residuals		Chemical Name	Neutons_Activ_SM	Zv_metal	Observed pBCF(Molluscs)	Set	Predicted pBCF(Molluscs)	Residuals		Chemical Name	χ (electronegativity) Pauling scale	Crystal ionic radius of the metal (pm)	Observed pBCF(Plants)	Set	Predicted pBCF(Plants)	Residuals			Chemical Name	MW	μ = 1/(PNmetal − 1)	Observed pBCF(Algae)	Set*	Predicted pBCF(Algae)	Residuals		Chemical Name
Manganese	1.24286	46	3.92942	T	2.86013	1.06929		Iron	0.5625	64.5	2.30103	T	2.13421	0.166816		Aluminum	13	53.5	1.5563	T	1.5626	-0.0062975		Iron	0	8	5.0569	T	5.004	0.0529049		Aluminum	1.61	53.5	2.34449	T	2.95875	-0.614259			Cupric chloride	134.452	0.333333	3.73911	V	3.69602	0.0430858		Aluminum chloride
Mercury	-7.2	102	5.14613	T	4.569	0.577128		Lead	15.21	119	1.80618	T	1.91272	-0.106537		Iron	26	64.5	0.863323	V	1.9032	-1.03988		Lead	0	4	2.91238	T	3.252	-0.339619		Iron	1.83	64.5	3.84491	T	2.96425	0.880662			Mercury chloride	271.496	0.2	5.09691	T	4.74288	0.354029		Cupric chloride
Nickel	-3.73333	69	4.88649	T	4.67683	0.209657		Manganese	0.734694	46	3.87506	V	2.3056	1.56946		Lead	82	119	0.531479	V	3.0744	-2.54292		Mercury	0	2	1.79239	T	2.376	-0.583608		Lead	2.33	119	4.02119	T	3.9945	0.0266893			Tetrachlorostannane	260.51	0.25	4.94939	T	5.04932	-0.099933		Mercury chloride
Silver	-11.2	126	5.36173	T	5.5834	-0.221672		Mercury	60.84	102	3.09691	T	2.92053	0.176382		Manganese	25	46	2.34242	T	2.6114	-0.268977		Nickel	0	2	0.939519	V	2.376	-1.43648		Manganese	1.55	46	2.97451	T	2.802	0.172512			Cobalt chloride	129.839	0.333333	3.38739	T	3.61622	-0.228828		Cobalt chloride
Antimony	-0.8	90	1.23045	T	0.8102	0.420249		Silver	132.25	126	4	T	4.03774	-0.037735		Mercury	80	102	4.43136	T	3.6588	0.772564		Tin	0	6	4.51188	V	4.128	0.383883		Mercury	2	102	3.19838	T	3.969	-0.770618			Zinc chloride	136.286	0.333333	4.25563	T	3.72775	0.527879		Zinc chloride
Arsenic	-0.366667	58	3.90309	T	3.07877	0.824323		Antimony	5.29	90	0.643453	V	1.99082	-1.34737		Nickel	28	69	0.5	V	1.8388	-1.3388		Antimony	71	5	0.633468	T	0.7009	-0.0674315		Nickel	1.91	69	2.0607	T	2.9835	-0.922802			Nickel chloride	129.599	0.333333	3.43136	T	3.61207	-0.180706		Iron chloride
Cadmium	-5.15	97	3.25527	T	3.45855	-0.203277		Barium	29.16	135	2	T	2.02814	-0.028142		Silver	47	126	0.5	T	0.6342	-0.1342		Arsenic	42	5	2.04139	T	1.9218	0.119593		Arsenic	2.18	58	2.44091	T	2.145	0.295909			Manganese chloride	125.844	0.333333	3.98811	T	3.5471	0.441012		Nickel chloride
Chromium	0.8	52	4.46675	V	3.0248	1.44195		Cadmium	33.0625	97	3	T	2.44654	0.553461		Antimony	0	90	-0.39794	T	-0.754	0.35606		Barium	0	2	1.15836	T	2.376	-1.21764		Cadmium	1.69	97	5.25527	T	4.3235	0.931773			Silver chloride	143.321	0.25	3.11394	T	3.02196	0.0919866		Copper chloride
Copper	-3.9	73	3.62839	T	4.4764	-0.848011		Cobalt	17.3611	74.5	2.39794	T	2.35745	0.0404922		Arsenic	0	58	0.623249	T	0.5772	0.0460493		Cadmium	0	2	3.36855	T	2.376	0.992547		Copper	1.9	73	3.63392	T	3.1385	0.495417			Cadmium chloride	183.317	0.25	2.96567	T	3.71388	-0.748212		Lead chloride
Vanadium	0.3	59	4.23401	V	2.7873	1.44671		Copper	20.25	73	1.44716	T	2.4251	-0.977947		Barium	56	135	0.5	T	0.8124	-0.3124		Cobalt	0	2	2.62325	T	2.376	0.247249		Zinc	1.65	74	3.06633	T	3.598	-0.531674			Barium chloride	208.233	0.2	3.78462	T	3.64843	0.136186		Manganese chlorid
Zinc	-4.06667	74	4.27875	T	4.51867	-0.239913		Zinc	21.7778	74	2.30103	T	2.44458	-0.143554		Cadmium	48	97	1.09691	T	1.902	-0.80509		Vanadium	0	5	3.74819	T	3.69	0.058188											Iron chloride	162.2	0.333333	3.91645	T	4.17606	-0.259606		Silver chloride
Selenium	2.41975	50	0.113943	T	1.6668	-1.55286		Selenium	2.41975	50	2.65321	T	2.30075	0.352463		Chromium	24	52	0.127105	V	2.3004	-2.1733		Zinc	0	2	1.15836	V	2.376	-1.21764		* T indicates training set																	Calcium chloride
																Cobalt	27	74.5	0.334454	V	1.5486	-1.21415		Calcium	0	2	3.11394	T	2.376	0.737943											* T and V indicate training and test sets, respectively								Cadmium chloride
* T and V indicate training and test sets, respectively								* T and V indicate training and test sets, respectively								Copper	29	73	6.41313	V	1.7338	4.67933																											Manganese chloride
																Vanadium	23	59	0.5	V	1.9478	-1.4478		* T and V indicate training and test sets, respectively
																Zinc	30	74	-1.52288	V	1.7536	-3.27648																											* T and V indicate training and test sets, respectively
																Calcium	20	99	0.5	T	0.0996	0.4004
																Selenium	0	50	0.886491	T	0.91	-0.0235093
																* T and V indicate training and test sets, respectively
[truncated: 34 more columns]

## Sheet: Sheet 8_q-RASPR Models
Metals																																								Metal halides
pBCF(Algae)								pBCF(Crustaceans)								pBCF(Fish)								pBCF(Molluscs)								pBCF(Plants)								pBCF(Algae)								pBCF(Crustaceans)
Chemical Name	SE(GK)	CVact(LK)	Observed pBCF(Algae)	Set*	Predicted pBCF(Algae)	Residuals		Chemical Name	SD Activity(GK)	CVact(GK)	Observed pBCF(Crustaceans)	Set*	Predicted pBCF(Crustaceans)	Residuals		Chemical Name	g(Euc)	gm(Euc)[Banerjee-Roy Coefficient]	Observed pBCF(Fish)	Set	Predicted pBCF(Fish)	Residuals		Chemical Name	SD Activity(GK)	CVact(Euc)	Observed pBCF(Molluscs)	Set	Predicted pBCF(Molluscs)	Residuals		Chemical Name	MaxNeg(Euc)	MaxNeg(GK)	Observed pBCF(Plants)	Set	Predicted pBCF(Plants)	Residuals		Chemical Name	gm(GK)[Banerjee-Roy Coefficient]	MW	Observed pBCF(Algae)	Set*	Predicted pBCF(Algae)	Residuals		Chemical Name	SE(EUC)
Manganese	1.36029	0.732429	3.92942	T	3.60297	0.326449		Antimony	1.02159	0.603065	0.643453	T	0.785145	-0.141692		Zinc	0.666667	-0.333333	-1.52288	T	0.14	-1.66288		Iron	1.34804	0.328142	5.0569	T	4.9865	0.0704017		Aluminum	1	1	2.34449	T	2.76	-0.415509		Copper chloride (CuCl2)	-0.333333	134.452	3.73911	T	3.42845	0.310657		Aluminum chloride (AlCl3)	1.29946
Mercury	0.664841	0.259729	5.14613	T	4.84144	0.304685		Copper	0.523417	0.255565	1.44716	T	2.01254	-0.565379		Antimony	0.666667	-0.333333	-0.39794	T	0.14	-0.53794		Lead	0.923689	0.326848	2.91238	T	3.58455	-0.672167		Iron	0.879093	0.933925	3.84491	T	3.85363	-0.0087201		Mercury chloride (HgCl2)	0.333333	271.496	5.09691	T	4.97338	0.123529		Copper chloride (CuCl2)	0.646074
Nickel	0.364281	0.150283	4.88649	T	4.35235	0.534145		Lead	0.615282	0.2807	1.80618	V	2.20292	-0.396743		Chromium	0.666667	-0.333333	0.127105	V	0.14	-0.0128952		Mercury	0.442959	0.34159	1.79239	T	1.90995	-0.117559		Lead	0.660212	0.328894	4.02119	T	4.00829	0.0129001		Tetrachlorostannane (SnCl4)	0.333333	260.51	4.94939	T	4.90351	0.0458797		Mercury chloride (HgCl2)	0.623506
Silver	0.623697	0.170087	5.36173	T	5.58082	-0.21909		Barium	0.546877	0.257958	2	T	2.10424	-0.104239		Cobalt	0	-1	0.334454	T	0.6	-0.265546		Nickel	0.442959	0.34159	0.939519	T	1.90995	-0.970432		Manganese	1	1	2.97451	T	2.76	0.214512		Cobalt chloride (CoCl2)	-0.333333	129.839	3.38739	T	3.39911	-0.0117208		Cobalt chloride (CoCl2)	0.644799
Antimony	1.03045	0.789595	1.23045	V	1.15168	0.0787646		Iron	0.182998	0.0748507	2.30103	T	2.24409	0.0569419		Nickel	0	-1	0.5	V	0.6	-0.1		Silver	1.04832	0.536004	3	T	2.88354	0.116462		Mercury	1	1	3.19838	T	2.76	0.438382		Zinc chloride (ZnCl2)	0.333333	136.286	4.25563	T	4.11345	0.142181		Zinc chloride (ZnCl2)	0.823904
Arsenic	0.163367	0.0682152	3.90309	T	4.1216	-0.218505		Zinc	0.523294	0.255496	2.30103	T	2.01267	0.288364		Silver	0	-1	0.5	T	0.6	-0.1		Tin	1.04731	0.294591	4.51188	T	4.16689	0.344993		Nickel	1	1	2.0607	T	2.76	-0.699302		Nickel chloride (NiCl2)	-0.333333	129.599	3.43136	T	3.39759	0.0337782		Iron chloride (FeCl3)	1.29612
Cadmium	0.594535	0.273458	3.25527	T	4.30227	-1.047		Cobalt	0.523245	0.255369	2.39794	T	2.01378	0.384161		Barium	0	-1	0.5	V	0.6	-0.1		Antimony	1.00609	0.927576	0.633468	T	0.656229	-0.0227605		Arsenic	1	1	2.44091	T	2.76	-0.319091		Manganese chloride (MnCl2)	0.333333	125.844	3.98811	T	4.04703	-0.0589217		Nickel chloride (NiCl2)	0.645915
Chromium	0.156267	0.0653827	4.46675	T	4.11271	0.35404		Selenium	0.826479	0.278631	2.65321	T	3.28104	-0.627826		Vanadium	0.666667	-0.333333	0.5	T	0.14	0.36		Arsenic	1.18037	0.684173	2.04139	V	2.53219	-0.490802		Cadmium	0.628981	0.606926	5.25527	T	5.40035	-0.145075		Silver chloride	-0.333333	143.321	3.11394	V	3.48486	-0.370913		Copper chloride (CuCl)	0.429582
Copper	0.362962	0.148574	3.62839	V	4.36347	-0.735083		Cadmium	1.34895	0.578484	3	T	2.68495	0.315045		Calcium	0	-1	0.5	T	0.6	-0.1		Barium	0.442959	0.34159	1.15836	T	1.90995	-0.751589		Copper	0.932314	0.984615	3.63392	T	3.45347	0.180443		Cadmium chloride (CdCl2)	-1	183.317	2.96567	T	3.0659	-0.100224		Lead chloride (PbCl2)	0.715488
Vanadium	0.162882	0.0647312	4.23401	T	4.15652	0.0774865		Mercury	0.614304	0.217393	3.09691	T	2.87542	0.221491		Lead	0.666667	-0.333333	0.531479	T	0.14	0.391479		Cadmium	0.442959	0.34159	3.36855	T	1.90995	1.4586		Zinc	1	1	3.06633	T	2.76	0.306326		Barium chloride	-0.333333	208.233	3.78462	T	3.8977	-0.113078		Manganese chloride (MnCl2)	0.666347
Zinc	0.362532	0.144464	4.27875	T	4.40547	-0.126714		Manganese	0.829883	0.277897	3.87506	V	3.30592	0.56914		Arsenic	0	-1	0.623249	V	0.6	0.0232493		Cobalt	0.442959	0.34159	2.62325	V	1.90995	0.713298										Iron chloride	0.333333	162.2	3.91645	T	4.27826	-0.361805		Silver chloride	0.431323
Selenium	1.38539	1.06463	0.113943	T	0.154709	-0.0407653		Silver	0.804132	0.207365	4	T	3.93186	0.0681414		Iron	0.666667	-0.333333	0.863323	T	0.14	0.723323		Vanadium	0.784585	0.209579	3.74819	V	3.74777	0.000421092		* T indicates training set																Calcium chloride (CaCl2)	0.663767
																Selenium	0.666667	-0.333333	0.886491	T	0.14	0.746491		Zinc	0.442959	0.34159	1.15836	T	1.90995	-0.751589										* T and V indicate training and test sets, respectively								Cadmium chloride (CdCl2)	0.828026
* T and V indicate training and test sets, respectively								* T and V indicate training and test sets, respectively								Cadmium	0	-1	1.09691	T	0.6	0.49691		Calcium	0.442959	0.34159	3.11394	T	1.90995	1.20399																		Manganese chloride	0.666347
																Mercury	0.666667	0.333333	4.43136	T	5.42	-0.988636
																Copper	0.666667	0.333333	6.41313	T	5.42	0.993132		* T and V indicate training and test sets, respectively																								* T and V indicate training and test sets, respectively
																* T and V indicate training and test sets, respectively
[truncated: 33 more columns]

## Sheet: Sheet 9-SbSDs Models
Metals																																								No.	Chemical Name		Metal halides
																																								59	Copper chloride (CuCl2)
QSPR								q-RASPR								QSPR								q-RASPR								HC5								60	Mercury chloride (HgCl2)		QSPR
																																								63	Cobalt chloride (CoCl2)
Chemical Name	Electrons_ActiveM	PN_metal	Observed pBCF(Mean)	Set*	Predicted pBCF(Mean)	Residuals		Chemical Name	gm(Euc)[Banerjee-Roy Coefficient]	PN_metal	Observed pBCF(Mean)	Set*	Predicted pBCF(Mean)	Residuals		Chemical Name	Neutons_ActiveM	PN_metal	Observed pBCF(SD)	Set*	Predicted pBCF(SD)	Residuals		Chemical Name	MaxNeg(GK)	gm(LK)[Banerjee-Roy Coefficient]	Observed pBCF(SD)	Set*	Predicted pBCF(SD)	Residuals		Chemical Name	MaxNeg(Euc)	Atomic radius (pm)	Observed HC5	Set*	Predicted HC5	Residuals		64	Zinc chloride (ZnCl2)		Chemical Name	VWR_ActivM	Nhalogen	Observed pBCF(Mean)	Set*	Predicted pBCF(Mean)	Residuals
Aluminum	13	3	3.21106	T	4.0033	-0.792238		Aluminum	0.333333	3	3.21106	T	3.474	-0.262938		Aluminum	14	3	2.21882	T	2.3674	-0.148584		Aluminum	0.485141	1	2.21882	T	2.24641	-0.0275977		Aluminum	1	184	0.364007	V	0.588	-0.223993		67	Iron chloride (FeCl3)		Copper chloride (CuCl2)	0.128	2	2.66937	T	2.64096	0.0284084
Iron	26	4	3.69951	T	3.2066	0.492907		Iron	0.333333	4	3.69951	T	3.272	0.427507		Iron	30	4	2.19809	T	1.851	0.34709		Iron	1	0.333333	2.19809	T	1.83267	0.365423		Iron	1	194	1.21241	T	0.783	0.429409		68	Nickel chloride (NiCl2)		Mercury chloride (HgCl2)	0.157	2	2.65164	T	2.78799	-0.136346
Lead	82	6	2.67379	T	2.9362	-0.262411		Lead	0.333333	6	2.67379	T	2.868	-0.194211		Lead	125	6	1.66562	T	1.7695	-0.103881		Lead	0.50349	0.333333	1.66562	T	1.69613	-0.0305071		Lead	1	202	0.858708	T	0.939	-0.0802925		71	Lead chloride (PbCl2)		Cobalt chloride (CoCl2)	0.125	2	2.41609	T	2.62575	-0.209657
Manganese	25	4	3.38968	T	3.1625	0.227185		Manganese	0.333333	4	3.38968	V	3.272	0.117685		Manganese	30	4	1.50799	T	1.851	-0.34301		Manganese	1	0.333333	1.50799	T	1.83267	-0.324677		Manganese	0.964724	197	8.11038	V	6.45038	1.66001		72	Manganese chloride (MnCl2)		Zinc chloride (ZnCl2)	0.138	2	2.75961	T	2.69166	0.0679508
Mercury	80	6	2.97354	T	2.848	0.125544		Mercury	0.333333	6	2.97354	T	2.868	0.105544		Mercury	121	6	1.79622	T	1.7091	0.0871179		Mercury	0.567167	0.333333	1.79622	T	1.71364	0.0825802		Mercury	1	209	1.04416	T	1.0755	-0.0313425		73	Silver chloride		Iron chloride (FeCl3)	0.126	3	3.41907	T	3.27682	0.142253
Nickel	28	4	2.09668	V	3.2948	-1.19812		Nickel	-0.333333	4	2.09668	T	2.072	0.024677		Nickel	31	4	1.97254	T	1.8661	0.10644		Nickel	0.999646	0.333333	1.97254	V	1.83257	0.139971		Nickel	1	163	0.0710965	T	0.1785	-0.107404		79	Cadmium chloride (CdCl2)		Nickel chloride (NiCl2)	0.124	2	1.36472	V	2.62068	-1.25596
Silver	47	5	3.4949	V	2.7627	0.732202		Silver	0.333333	5	3.4949	V	3.07	0.424902		Silver	61	5	1.88442	T	1.5611	0.323322		Silver	0.996815	0.333333	1.88442	T	1.83179	0.0526314		Silver	1	172	2.48329	T	0.354	2.12929		83	Manganese chloride		Lead chloride (PbCl2)	0.154	2	2.50129	T	2.77278	-0.271487
Antimony	0	5	0.586842	T	0.69	-0.103158		Antimony	-1	5	0.586842	T	0.67	-0.0831584		Antimony	0	5	0.534449	T	0.64	-0.105551		Antimony	1	-1	0.534449	V	0.722	-0.187551		Antimony	1	206	0.510121	T	1.017	-0.506879		84	Iron chloride		Manganese chloride (MnCl2)	0.126	2	2.78823	T	2.63082	0.157414
Arsenic	0	4	2.55879	T	2.06	0.498794		Arsenic	-0.333333	4	2.55879	T	2.072	0.486794		Arsenic	0	4	1.35457	T	1.398	-0.0434285		Arsenic	1	-0.333333	1.35457	V	1.27733	0.0772382		Arsenic	1	185	2.14054	T	0.6075	1.53304		58	Aluminum chloride (AlCl3)		Silver chloride	0.144	1	2.06633	T	2.07608	-0.00975476
Barium	56	6	1.21945	T	1.7896	-0.570146		Barium	-0.333333	6	1.21945	V	1.668	-0.448546		Barium	81	6	0.751864	V	1.1051	-0.353236		Barium	1	-0.333333	0.751864	V	1.27733	-0.52547		Barium	1	268	0.960812	V	2.226	-1.26519		61	Lithium bromide (LiBr)		Cadmium chloride (CdCl2)	0.154	2	3.1834	T	2.77278	0.410624
Cadmium	48	5	3.44149	T	2.8068	0.634692		Cadmium	0.333333	5	3.44149	V	3.07	0.371492		Cadmium	64	5	1.28311	T	1.6064	-0.323293		Cadmium	1	-0.333333	1.28311	T	1.27733	0.00577343		Cadmium	0.870963	158	21.4181	T	20.5979	0.820287		62	Tetrachlorostannane (SnCl4)		Manganese chloride	0.126	2	1.13696	V	2.63082	-1.49386
Chromium	24	4	2.35699	V	3.1184	-0.761408		Chromium	-0.333333	4	2.35699	T	2.072	0.284992		Chromium	28	4	2.17231	T	1.8208	0.351515		Chromium	0	1	2.17231	T	2.113	0.0593147		Chromium	1	189	0.0607483	V	0.6855	-0.624752		65	Cesium chloride (CsCl)		Iron chloride	0.126	3	3.13061	T	3.27682	-0.146208
Cobalt	27	4	1.81053	V	3.2507	-1.44017		Cobalt	-0.333333	4	1.81053	T	2.072	-0.261467		Copper	35	4	1.73076	T	1.9265	-0.195739		Cobalt	1	-0.333333	1.0312	T	1.27733	-0.246131		Cobalt	1	192	1.30079	T	0.744	0.556786		66	Sodium fluoride (NaF)
Copper	29	4	3.54996	T	3.3389	0.21106		Copper	0.333333	4	3.54996	T	3.272	0.27796		Vanadium	28	4	2.03017	V	1.8208	0.209372		Copper	0.996815	0.333333	1.73076	T	1.83179	-0.101029		Copper	0.963388	140	5.04496	T	5.55137	-0.506406		69	Copper chloride (CuCl)		* T and V indicate training and test sets, respectively
Vanadium	23	4	2.8274	T	3.0743	-0.2469		Vanadium	0.333333	4	2.8274	T	3.272	-0.4446		Zinc	35	4	2.03642	V	1.9265	0.10992		Vanadium	0	1	2.03017	T	2.113	-0.0828282		Vanadium	1	179	0.307445	T	0.4905	-0.183055		70	Iron chloride (FeCl2)
Zinc	30	4	2.27168	V	3.383	-1.11132		Zinc	-0.333333	4	2.27168	V	2.072	0.199681		Selenium	0	4	1.47458	T	1.398	0.0765782		Zinc	0.996815	0.333333	2.03642	V	1.83179	0.204629		Zinc	1	139	0.0835161	T	-0.2895	0.373016		74	Beryllium chloride
Selenium	0	4	1.72897	T	2.06	-0.331035		Selenium	-0.333333	4	1.72897	T	2.072	-0.343035										Selenium	1	-0.333333	1.47458	T	1.27733	0.197245		Selenium	1	190	0.201041	T	0.705	-0.503959		75	Indium chloride (InCl3)
																* T and V indicate training and test sets, respectively																								76	Antimony trichloride
* T and V indicate training and test sets, respectively								* T and V indicate training and test sets, respectively																* T and V indicate training and test sets, respectively								* T and V indicate training and test sets, respectively								77	(T-4)-Selenium chloride (SeCl4)
																																								78	Calcium chloride (CaCl2)
																																								80	Mercury chloride (Hg2Cl2)
																																								81	Barium chloride
																																								82	Strontium chloride (SrCl2)
																																								85	Mercury chloride

[truncated: 3 more sheets: Sheet 10-Overview of models, Sheet 11-q-RASPR_Descriptors, Sheet 12-Extended chemical List]
